# Supplementary material
Source: PubMed Central journal article supplement (PMC2410072)

UV - + - + - + - +

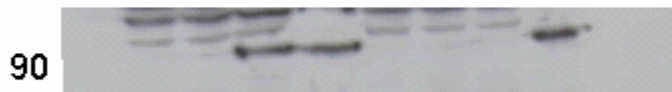

Parp Fragment

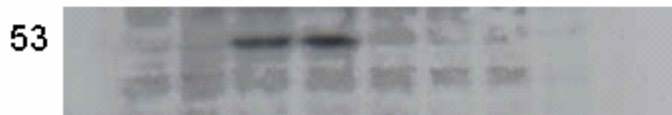

p53

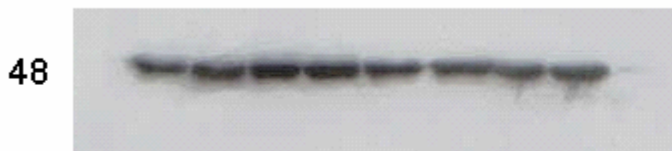

$\alpha$ -Tubulin

Control 150  $\mu$ M 2  $\mu$ M 20  $\mu$ M  
Cisplatin Complex 1 Complex 1

Supplement: pnas_0707742105_7.pdf [file pnas_0707742105_7.pdf]
